# Supplementary material for: Metabolomics and 16S rRNA sequencing of human colorectal cancers and adjacent mucosa
Source: PLoS One. 2018 Dec 21;13(12):e0208584. doi: 10.1371/journal.pone.0208584 (PMC6303059; doi:10.1371/journal.pone.0208584)
Supplement: S4 Table — (XLSX) [file pone.0208584.s004.xlsx]

## Sheet: Pearson_KEGG_taxa_mod
Taxa	Env	Correlation	Pvalue	Type	AdjPvalue	Significance
Actinomyces	ko00020	-0.0872893	0.739039	Normal	0.911812
Actinomyces	ko00020	0.051128	0.84549	Tumour	0.911812
Actinomyces	ko00061	0.343339	0.177259	Normal	0.726661
Actinomyces	ko00061	0.0913728	0.727259	Tumour	0.876988
Actinomyces	ko00100	0.0681955	0.794816	Tumour	0.883539
Actinomyces	ko00100	0.038443	0.883539	Normal	0.883539
Actinomyces	ko00561	-0.310924	0.224473	Tumour	0.748123
Actinomyces	ko00561	-0.247423	0.338341	Normal	0.748123
Actinomyces	ko00660	-0.252818	0.327569	Normal	0.696932
Actinomyces	ko00660	-0.0965764	0.71233	Tumour	0.835803
Actinomyces	ko00770	0.335922	0.187422	Tumour	0.384215
Actinomyces	ko00770	0.15916	0.541758	Normal	0.673093
Actinomyces	ko00909	0.063398	0.808991	Tumour	0.87275
Actinomyces	ko00909	0.0473621	0.856756	Normal	0.87275
Actinomyces	ko05131	0.288616	0.261237	Tumour	0.714049
Actinomyces	ko05131	0.108595	0.678233	Normal	0.800867
Alistipes	ko00020	0.23961	0.3543	Tumour	0.726314
Alistipes	ko00020	0.188882	0.467816	Normal	0.769986
Alistipes	ko00061	0.384101	0.127972	Normal	0.726661
Alistipes	ko00061	0.1532	0.557183	Tumour	0.876988
Alistipes	ko00100	-0.126317	0.629031	Normal	0.883539
Alistipes	ko00100	0.0546838	0.834879	Tumour	0.883539
Alistipes	ko00561	-0.309822	0.226207	Tumour	0.748123
Alistipes	ko00561	-0.274887	0.28561	Normal	0.748123
Alistipes	ko00660	-0.419831	0.0934015	Normal	0.425496
Alistipes	ko00660	-0.12839	0.623367	Tumour	0.814418
Alistipes	ko00770	-0.456069	0.0657701	Normal	0.271567
Alistipes	ko00770	0.219606	0.397052	Tumour	0.57634
Alistipes	ko00909	-0.123174	0.637657	Normal	0.87275
Alistipes	ko00909	0.0452466	0.863096	Tumour	0.87275
Alistipes	ko05131	0.516577	0.0337452	Tumour	0.197651
Alistipes	ko05131	0.0616953	0.814035	Normal	0.866225
Anaerotruncus	ko00020	0.428392	0.0862312	Normal	0.726314
Anaerotruncus	ko00020	0.391144	0.120543	Tumour	0.726314
Anaerotruncus	ko00061	-0.53318	0.0275294	Normal	0.564352
Anaerotruncus	ko00061	-0.446724	0.0722294	Tumour	0.726661
Anaerotruncus	ko00100	0.89593	1.15e-06	Normal	4.73e-05	***
Anaerotruncus	ko00100	0.871328	5.26e-06	Tumour	0.000107818	***
Anaerotruncus	ko00561	-0.377401	0.135329	Tumour	0.713649
Anaerotruncus	ko00561	-0.226582	0.381837	Normal	0.748123
Anaerotruncus	ko00660	0.250503	0.332167	Normal	0.696932
Anaerotruncus	ko00660	0.224547	0.386242	Tumour	0.696932
Anaerotruncus	ko00770	0.554881	0.0207819	Normal	0.14201
Anaerotruncus	ko00770	0.427817	0.0866996	Tumour	0.296224
Anaerotruncus	ko00909	0.900868	8.13e-07	Normal	3.33e-05	***
Anaerotruncus	ko00909	0.872806	4.84e-06	Tumour	9.93e-05	***
Anaerotruncus	ko05131	-0.187727	0.470592	Normal	0.78268
Anaerotruncus	ko05131	-0.125598	0.631001	Tumour	0.800867
Bacteroides	ko00020	0.293756	0.252455	Tumour	0.726314
Bacteroides	ko00020	0.22074	0.394556	Normal	0.736681
Bacteroides	ko00061	0.314243	0.219303	Normal	0.749286
Bacteroides	ko00061	0.105712	0.686361	Tumour	0.876988
Bacteroides	ko00100	-0.138489	0.596059	Normal	0.883539
Bacteroides	ko00100	-0.0492542	0.851092	Tumour	0.883539
Bacteroides	ko00561	-0.236528	0.360711	Normal	0.748123
Bacteroides	ko00561	-0.106163	0.68509	Tumour	0.914515
Bacteroides	ko00660	-0.361641	0.153775	Normal	0.573161
Bacteroides	ko00660	-0.10724	0.682049	Tumour	0.835803
Bacteroides	ko00770	-0.475811	0.053539	Normal	0.271567
Bacteroides	ko00770	-0.199847	0.441873	Tumour	0.603893
Bacteroides	ko00909	-0.135789	0.60331	Normal	0.87275
Bacteroides	ko00909	-0.0548571	0.834362	Tumour	0.87275
Bacteroides	ko05131	0.358762	0.157321	Tumour	0.586377
Bacteroides	ko05131	0.0583487	0.82397	Normal	0.866225
Bifidobacterium	ko00020	0.0110078	0.966554	Normal	0.966554
Bifidobacterium	ko00061	0.0795156	0.761616	Normal	0.892179
Bifidobacterium	ko00100	-0.158988	0.542199	Normal	0.883539
Bifidobacterium	ko00561	-0.133891	0.608432	Normal	0.914515
Bifidobacterium	ko00660	-0.225787	0.383555	Normal	0.696932
Bifidobacterium	ko00770	-0.344186	0.176123	Normal	0.380054
Bifidobacterium	ko00909	-0.157361	0.546394	Normal	0.87275
Bifidobacterium	ko05131	-0.156694	0.548116	Normal	0.800867
Christensenella	ko00020	0.285276	0.267044	Normal	0.726314
Christensenella	ko00020	-0.248528	0.336119	Tumour	0.726314
Christensenella	ko00061	-0.092587	0.723767	Normal	0.876988
Christensenella	ko00061	0.0124622	0.962138	Tumour	0.962138
Christensenella	ko00100	0.26101	0.311594	Tumour	0.883539
Christensenella	ko00100	0.170453	0.513062	Normal	0.883539
Christensenella	ko00561	-0.225958	0.383185	Normal	0.748123
Christensenella	ko00561	-0.0170235	0.948296	Tumour	0.976368
Christensenella	ko00660	0.625831	0.00720381	Normal	0.147678	*
Christensenella	ko00660	0.491951	0.0448727	Tumour	0.30663
Christensenella	ko00770	0.316303	0.216133	Normal	0.405796
Christensenella	ko00770	0.241829	0.349724	Tumour	0.555021
Christensenella	ko00909	0.264789	0.304385	Tumour	0.87275
Christensenella	ko00909	0.14608	0.575862	Normal	0.87275
Christensenella	ko05131	0.378822	0.133744	Tumour	0.548352
Christensenella	ko05131	0.30234	0.238204	Normal	0.714049
Collinsella	ko00020	-0.375743	0.137194	Normal	0.726314
Collinsella	ko00020	-0.256478	0.320373	Tumour	0.726314
Collinsella	ko00061	-0.263921	0.306033	Tumour	0.776795
Collinsella	ko00061	-0.251396	0.330388	Normal	0.776795
Collinsella	ko00100	-0.124191	0.634861	Normal	0.883539
Collinsella	ko00100	0.0864748	0.741396	Tumour	0.883539
Collinsella	ko00561	0.4461	0.0726767	Normal	0.713649
Collinsella	ko00561	0.380184	0.132238	Tumour	0.713649
Collinsella	ko00660	0.513051	0.0351932	Tumour	0.30663
Collinsella	ko00660	0.00276245	0.991605	Normal	0.991605
Collinsella	ko00770	0.369456	0.144426	Tumour	0.380054
Collinsella	ko00770	-0.0474357	0.856536	Normal	0.900461
Collinsella	ko00909	-0.105467	0.687055	Normal	0.87275
Collinsella	ko00909	0.0783132	0.765125	Tumour	0.87275
Collinsella	ko05131	-0.190489	0.463969	Normal	0.78268
Collinsella	ko05131	-0.0889674	0.734191	Tumour	0.836162
Desulfovibrio	ko00020	0.251009	0.331158	Tumour	0.726314
Desulfovibrio	ko00020	0.14221	0.586122	Normal	0.871719
Desulfovibrio	ko00061	-0.118878	0.649521	Tumour	0.876988
Desulfovibrio	ko00061	0.0585307	0.823429	Normal	0.912449
Desulfovibrio	ko00100	0.329376	0.196705	Tumour	0.883539
Desulfovibrio	ko00100	0.162111	0.53419	Normal	0.883539
Desulfovibrio	ko00561	-0.134707	0.606227	Normal	0.914515
Desulfovibrio	ko00561	-0.123423	0.636972	Tumour	0.914515
Desulfovibrio	ko00660	0.170865	0.512028	Tumour	0.799109
Desulfovibrio	ko00660	0.0239702	0.927241	Normal	0.974792
Desulfovibrio	ko00770	0.369605	0.144251	Tumour	0.380054
Desulfovibrio	ko00770	0.315254	0.217744	Normal	0.405796
Desulfovibrio	ko00909	0.325848	0.201832	Tumour	0.87275
Desulfovibrio	ko00909	0.158968	0.542252	Normal	0.87275
Desulfovibrio	ko05131	0.994507	4.04e-16	Tumour	1.66e-14	***
Desulfovibrio	ko05131	0.978494	1.08e-11	Normal	2.2e-10	***
Dialister	ko00020	0.115428	0.659105	Normal	0.871719
Dialister	ko00020	0.0504245	0.847593	Tumour	0.911812
Dialister	ko00061	0.0714319	0.785287	Tumour	0.894355
Dialister	ko00061	-0.017015	0.948321	Normal	0.962138
Dialister	ko00100	0.103565	0.692437	Tumour	0.883539
Dialister	ko00100	-0.0641892	0.806649	Normal	0.883539
Dialister	ko00561	0.0838372	0.749041	Tumour	0.959709
Dialister	ko00561	-0.0477108	0.855712	Normal	0.976368
Dialister	ko00660	0.157257	0.546661	Tumour	0.800469
Dialister	ko00660	0.0101175	0.969258	Normal	0.991605
Dialister	ko00770	0.214829	0.407655	Normal	0.57634
Dialister	ko00770	-0.0163856	0.95023	Tumour	0.95023
Dialister	ko00909	0.0962157	0.713362	Tumour	0.87275
Dialister	ko00909	-0.0420307	0.87275	Normal	0.87275
Dialister	ko05131	0.620834	0.00782459	Tumour	0.080202	*
Dialister	ko05131	0.55285	0.0213522	Normal	0.145906
Intestinimonas	ko00020	0.347538	0.171672	Tumour	0.726314
Intestinimonas	ko00020	0.220405	0.395292	Normal	0.736681
Intestinimonas	ko00061	-0.261811	0.310059	Tumour	0.776795
Intestinimonas	ko00061	-0.132228	0.612932	Normal	0.876988
Intestinimonas	ko00100	0.733193	0.000811595	Tumour	0.00871653	**
Intestinimonas	ko00100	0.689349	0.00220386	Normal	0.0180717	*
Intestinimonas	ko00561	-0.472431	0.0555013	Tumour	0.713649
Intestinimonas	ko00561	-0.310332	0.225404	Normal	0.748123
Intestinimonas	ko00660	0.123906	0.635643	Tumour	0.814418
Intestinimonas	ko00660	-0.037632	0.885981	Normal	0.957187
Intestinimonas	ko00770	0.594274	0.0118803	Tumour	0.0974181
Intestinimonas	ko00770	0.492286	0.0447049	Normal	0.261843
Intestinimonas	ko00909	0.728763	0.000905326	Tumour	0.00927959	**
Intestinimonas	ko00909	0.696851	0.00188022	Normal	0.0154178	*
Intestinimonas	ko05131	0.201767	0.437408	Tumour	0.78268
Intestinimonas	ko05131	-0.0394574	0.880486	Normal	0.902499
Megasphaera	ko00020	-0.198484	0.445057	Tumour	0.769986
Megasphaera	ko00020	-0.128753	0.622377	Normal	0.871719
Megasphaera	ko00061	0.109769	0.674934	Tumour	0.876988
Megasphaera	ko00061	-0.0930438	0.722454	Normal	0.876988
Megasphaera	ko00100	-0.230786	0.372825	Normal	0.883539
Megasphaera	ko00100	-0.181812	0.484936	Tumour	0.883539
Megasphaera	ko00561	0.0579895	0.825038	Normal	0.976368
Megasphaera	ko00561	0.0544181	0.835671	Tumour	0.976368
Megasphaera	ko00660	0.273259	0.288589	Tumour	0.696932
Megasphaera	ko00660	0.0444379	0.865522	Normal	0.957187
Megasphaera	ko00770	0.0947991	0.717419	Normal	0.815546
Megasphaera	ko00770	-0.0164201	0.950126	Tumour	0.95023
Megasphaera	ko00909	-0.200064	0.441366	Normal	0.87275
Megasphaera	ko00909	-0.182678	0.482822	Tumour	0.87275
Megasphaera	ko05131	-0.232041	0.370158	Normal	0.78268
Megasphaera	ko05131	-0.172434	0.508104	Tumour	0.800867
Mitsuokella	ko00020	-0.18818	0.469504	Tumour	0.769986
Mitsuokella	ko00020	-0.0732834	0.779849	Normal	0.911812
Mitsuokella	ko00061	-0.12038	0.645364	Normal	0.876988
Mitsuokella	ko00061	0.109227	0.676456	Tumour	0.876988
Mitsuokella	ko00100	-0.184167	0.4792	Normal	0.883539
Mitsuokella	ko00100	-0.118597	0.650299	Tumour	0.883539
Mitsuokella	ko00561	-0.0357917	0.891525	Tumour	0.976368
Mitsuokella	ko00561	-0.0297751	0.909682	Normal	0.976368
Mitsuokella	ko00660	0.440636	0.0766797	Tumour	0.392984
Mitsuokella	ko00660	0.149566	0.566684	Normal	0.801173
Mitsuokella	ko00770	0.179825	0.489801	Normal	0.627558
Mitsuokella	ko00770	0.0875049	0.738416	Tumour	0.815546
Mitsuokella	ko00909	-0.152183	0.559836	Normal	0.87275
Mitsuokella	ko00909	-0.119151	0.648763	Tumour	0.87275
Mitsuokella	ko05131	-0.184973	0.477244	Normal	0.78268
Mitsuokella	ko05131	-0.106667	0.683667	Tumour	0.800867
Morganella	ko00020	-0.249264	0.334643	Tumour	0.726314
Morganella	ko00020	-0.0698615	0.789907	Normal	0.911812
Morganella	ko00061	0.13402	0.608084	Normal	0.876988
Morganella	ko00061	-0.100159	0.702109	Tumour	0.876988
Morganella	ko00100	-0.264725	0.304506	Tumour	0.883539
Morganella	ko00100	-0.255051	0.323168	Normal	0.883539
Morganella	ko00561	0.199773	0.442044	Tumour	0.77398
Morganella	ko00561	-0.0217729	0.933897	Normal	0.976368
Morganella	ko00660	-0.223911	0.387624	Normal	0.696932
Morganella	ko00660	-0.037244	0.887149	Tumour	0.957187
Morganella	ko00770	-0.455373	0.0662359	Normal	0.271567
Morganella	ko00770	-0.266585	0.300993	Tumour	0.514197
Morganella	ko00909	-0.26764	0.299012	Normal	0.87275
Morganella	ko00909	-0.256078	0.321155	Tumour	0.87275
Morganella	ko05131	-0.228452	0.377814	Tumour	0.78268
Morganella	ko05131	-0.108123	0.679561	Normal	0.800867
Negativibacillus	ko00020	-0.329187	0.196977	Tumour	0.726314
Negativibacillus	ko00020	-0.256134	0.321046	Normal	0.726314
Negativibacillus	ko00061	-0.150323	0.564698	Normal	0.876988
Negativibacillus	ko00061	0.0375551	0.886212	Tumour	0.956176
Negativibacillus	ko00100	-0.247985	0.337211	Normal	0.883539
Negativibacillus	ko00100	-0.121463	0.642371	Tumour	0.883539
Negativibacillus	ko00561	0.203685	0.432969	Normal	0.77398
Negativibacillus	ko00561	0.106845	0.683162	Tumour	0.914515
Negativibacillus	ko00660	0.570076	0.0168818	Tumour	0.230719
Negativibacillus	ko00660	0.298112	0.245159	Normal	0.696932
Negativibacillus	ko00770	0.234245	0.365502	Normal	0.555021
Negativibacillus	ko00770	0.185348	0.476335	Tumour	0.627558
Negativibacillus	ko00909	-0.219839	0.396537	Normal	0.87275
Negativibacillus	ko00909	-0.124487	0.63405	Tumour	0.87275
Negativibacillus	ko05131	-0.15269	0.558513	Normal	0.800867
Negativibacillus	ko05131	-0.0226316	0.931295	Tumour	0.931295
Oscillibacter	ko00020	0.300901	0.240558	Tumour	0.726314
Oscillibacter	ko00020	0.0835418	0.749899	Normal	0.911812
Oscillibacter	ko00061	-0.342752	0.17805	Tumour	0.726661
Oscillibacter	ko00061	-0.153626	0.556075	Normal	0.876988
Oscillibacter	ko00100	0.731311	0.000850393	Tumour	0.00871653	**
Oscillibacter	ko00100	0.623951	0.00743253	Normal	0.050789	*
Oscillibacter	ko00561	-0.474128	0.0545092	Tumour	0.713649
Oscillibacter	ko00561	-0.280296	0.275849	Normal	0.748123
Oscillibacter	ko00660	0.260047	0.313448	Tumour	0.696932
Oscillibacter	ko00660	0.186565	0.473393	Normal	0.799109
Oscillibacter	ko00770	0.748971	0.000540406	Tumour	0.0189022	**
Oscillibacter	ko00770	0.617307	0.00828792	Normal	0.0974181	*
Oscillibacter	ko00909	0.729794	0.000882738	Tumour	0.00927959	**
Oscillibacter	ko00909	0.62256	0.00760555	Normal	0.0519713	*
Oscillibacter	ko05131	0.330676	0.194838	Tumour	0.665697
Oscillibacter	ko05131	0.21199	0.414027	Normal	0.78268
Parabacteroides	ko00020	0.27606	0.283475	Tumour	0.726314
Parabacteroides	ko00020	0.0624686	0.811743	Normal	0.911812
Parabacteroides	ko00061	0.539599	0.0253789	Normal	0.564352
Parabacteroides	ko00061	0.0160098	0.951371	Tumour	0.962138
Parabacteroides	ko00100	-0.191966	0.460444	Normal	0.883539
Parabacteroides	ko00100	0.0453234	0.862866	Tumour	0.883539
Parabacteroides	ko00561	-0.195079	0.453062	Tumour	0.77398
Parabacteroides	ko00561	-0.103909	0.691462	Normal	0.914515
Parabacteroides	ko00660	-0.751372	0.000506681	Normal	0.0207739	**
Parabacteroides	ko00660	-0.138552	0.595891	Tumour	0.814384
Parabacteroides	ko00770	-0.603166	0.0103706	Normal	0.0974181
Parabacteroides	ko00770	-0.0814872	0.755872	Tumour	0.815546
Parabacteroides	ko00909	-0.191797	0.460846	Normal	0.87275
Parabacteroides	ko00909	0.0452373	0.863124	Tumour	0.87275
Parabacteroides	ko05131	-0.12927	0.620969	Normal	0.800867
Parabacteroides	ko05131	-0.114864	0.660677	Tumour	0.800867
Prevotella	ko00020	-0.254904	0.323456	Normal	0.726314
Prevotella	ko00020	-0.147381	0.572427	Tumour	0.871719
Prevotella	ko00061	-0.495565	0.0430867	Tumour	0.588851
Prevotella	ko00061	-0.418597	0.0944696	Normal	0.726661
Prevotella	ko00100	-0.16863	0.517645	Normal	0.883539
Prevotella	ko00100	0.0746592	0.775814	Tumour	0.883539
Prevotella	ko00561	0.377235	0.135514	Tumour	0.713649
Prevotella	ko00561	0.373934	0.139249	Normal	0.713649
Prevotella	ko00660	0.404941	0.106877	Tumour	0.438195
Prevotella	ko00660	0.22238	0.390962	Normal	0.696932
Prevotella	ko00770	0.357124	0.159363	Tumour	0.380054
Prevotella	ko00770	0.297144	0.246769	Normal	0.439892
Prevotella	ko00909	-0.148451	0.569613	Normal	0.87275
Prevotella	ko00909	0.0728338	0.781169	Tumour	0.87275
Prevotella	ko05131	0.409683	0.102444	Tumour	0.466688
Prevotella	ko05131	0.226671	0.381645	Normal	0.78268
Pseudoflavonifractor	ko00020	-0.46958	0.0571986	Normal	0.726314
Pseudoflavonifractor	ko00020	0.137972	0.597444	Tumour	0.871719
Pseudoflavonifractor	ko00061	-0.260453	0.312665	Tumour	0.776795
Pseudoflavonifractor	ko00061	-0.246091	0.341032	Normal	0.776795
Pseudoflavonifractor	ko00100	0.472374	0.0555349	Tumour	0.325276
Pseudoflavonifractor	ko00100	0.111033	0.671387	Normal	0.883539
Pseudoflavonifractor	ko00561	-0.264121	0.305651	Tumour	0.748123
Pseudoflavonifractor	ko00561	0.248859	0.335455	Normal	0.748123
Pseudoflavonifractor	ko00660	0.499995	0.0409712	Tumour	0.30663
Pseudoflavonifractor	ko00660	0.165231	0.526242	Normal	0.799109
Pseudoflavonifractor	ko00770	0.728012	0.000922059	Tumour	0.0189022	**
Pseudoflavonifractor	ko00770	0.389482	0.122267	Normal	0.380054
Pseudoflavonifractor	ko00909	0.468455	0.0578787	Tumour	0.339004
Pseudoflavonifractor	ko00909	0.124668	0.633551	Normal	0.87275
Pseudoflavonifractor	ko05131	0.638125	0.0058436	Tumour	0.0798625	*
Pseudoflavonifractor	ko05131	-0.0675665	0.796671	Normal	0.866225
Pseudomonas	ko00020	0.472127	0.055681	Normal	0.726314
Pseudomonas	ko00020	-0.120658	0.644594	Tumour	0.871719
Pseudomonas	ko00061	0.365949	0.148572	Normal	0.726661
Pseudomonas	ko00061	-0.156488	0.548651	Tumour	0.876988
Pseudomonas	ko00100	-0.208238	0.42253	Normal	0.883539
Pseudomonas	ko00100	-0.0643457	0.806186	Tumour	0.883539
Pseudomonas	ko00561	-0.398989	0.11263	Normal	0.713649
Pseudomonas	ko00561	-0.00777679	0.976368	Tumour	0.976368
Pseudomonas	ko00660	0.309125	0.227309	Normal	0.696932
Pseudomonas	ko00660	-0.169971	0.514273	Tumour	0.799109
Pseudomonas	ko00770	-0.237657	0.358354	Tumour	0.555021
Pseudomonas	ko00770	-0.102505	0.695443	Normal	0.814662
Pseudomonas	ko00909	-0.217012	0.40279	Normal	0.87275
Pseudomonas	ko00909	-0.0470871	0.85758	Tumour	0.87275
Pseudomonas	ko05131	-0.223873	0.387706	Normal	0.78268
Pseudomonas	ko05131	-0.148963	0.568265	Tumour	0.800867
Rhodococcus	ko00020	0.439339	0.077653	Normal	0.726314
Rhodococcus	ko00020	0.0438345	0.867333	Tumour	0.911812
Rhodococcus	ko00061	0.395218	0.116386	Normal	0.726661
Rhodococcus	ko00061	0.0964956	0.712561	Tumour	0.876988
Rhodococcus	ko00100	-0.2076	0.423984	Normal	0.883539
Rhodococcus	ko00100	0.0732425	0.779969	Tumour	0.883539
Rhodococcus	ko00561	-0.35822	0.157995	Normal	0.719754
Rhodococcus	ko00561	-0.291265	0.256689	Tumour	0.748123
Rhodococcus	ko00660	0.283414	0.270316	Normal	0.696932
Rhodococcus	ko00660	-0.0961708	0.713491	Tumour	0.835803
Rhodococcus	ko00770	0.344635	0.175522	Tumour	0.380054
Rhodococcus	ko00770	-0.138328	0.59649	Normal	0.719297
Rhodococcus	ko00909	-0.218036	0.400518	Normal	0.87275
Rhodococcus	ko00909	0.0688445	0.792903	Tumour	0.87275
Rhodococcus	ko05131	0.293289	0.253246	Tumour	0.714049
Rhodococcus	ko05131	-0.226356	0.382325	Normal	0.78268
Succinivibrio	ko00020	0.240908	0.351621	Tumour	0.726314
Succinivibrio	ko00020	-0.0288275	0.912546	Normal	0.93536
Succinivibrio	ko00061	-0.330592	0.194958	Tumour	0.726661
Succinivibrio	ko00061	-0.298707	0.244172	Normal	0.77008
Succinivibrio	ko00100	0.330527	0.195051	Tumour	0.883539
Succinivibrio	ko00100	0.23307	0.36798	Normal	0.883539
Succinivibrio	ko00561	-0.133154	0.610425	Tumour	0.914515
Succinivibrio	ko00561	0.0131014	0.960198	Normal	0.976368
Succinivibrio	ko00660	0.453999	0.0671626	Normal	0.392984
Succinivibrio	ko00660	0.31443	0.219014	Tumour	0.696932
Succinivibrio	ko00770	0.437209	0.0792709	Tumour	0.295464
Succinivibrio	ko00770	0.346465	0.173089	Normal	0.380054
Succinivibrio	ko00909	0.33805	0.184468	Tumour	0.87275
Succinivibrio	ko00909	0.211208	0.415792	Normal	0.87275
Succinivibrio	ko05131	0.59093	0.0124909	Tumour	0.102425
Succinivibrio	ko05131	0.48373	0.049143	Normal	0.251858
